# Supplementary material
Source: PubMed Central journal article supplement (PMC5806518)
Supplement: NIHMS926471-supplement-supplement_1.pdf [file NIHMS926471-supplement-supplement_1.pdf]

**Supplemental Table 1.** Distribution of study characteristics among men and women residing in California by race/ethnicity, Multiethnic Cohort, 1993-1996.

| Study Characteristics                | Men        |                   |                    |            |            | Women      |                   |                    |            |            |
|--------------------------------------|------------|-------------------|--------------------|------------|------------|------------|-------------------|--------------------|------------|------------|
|                                      | All        | African Americans | Japanese Americans | Latinos    | Whites     | All        | African Americans | Japanese Americans | Latinas    | Whites     |
|                                      | (n=44,223) | (n=11,466)        | (n=6,042)          | (n=21,625) | (n=5,090)  | (n=58,683) | (n=20,266)        | (n=6,296)          | (n=23,006) | (n=9,115)  |
| Age at baseline, years               | 61.3 ± 8.2 | 62.0 ± 8.8        | 62.2 ± 8.9         | 60.4 ± 7.7 | 62.4 ± 8.1 | 60.4 ± 8.4 | 60.6 ± 9.0        | 61.8 ± 8.7         | 59.5 ± 7.7 | 61.1 ± 8.3 |
| BMI at baseline, kg/m <sup>2,a</sup> |            |                   |                    |            |            |            |                   |                    |            |            |
| Underweight                          | 0.6        | 0.9               | 0.9                | 0.4        | 0.3        | 1.8        | 1.1               | 6.5                | 0.9        | 2.2        |
| Normal                               | 31.1       | 29.4              | 53.2               | 25.0       | 34.4       | 34.5       | 24.1              | 68.5               | 30.3       | 44.8       |
| Overweight                           | 49.6       | 47.6              | 40.3               | 53.7       | 48.0       | 35.7       | 37.1              | 20.5               | 40.3       | 31.6       |
| Obese                                | 18.7       | 22.1              | 5.6                | 20.9       | 17.3       | 28.0       | 37.6              | 4.5                | 28.6       | 21.4       |
| BMI at age 21, kg/m <sup>2,a</sup>   |            |                   |                    |            |            |            |                   |                    |            |            |
| Underweight                          | 5.1        | 4.7               | 3.6                | 5.8        | 5.0        | 12.9       | 14.4              | 15.9               | 11.1       | 12.2       |
| Normal                               | 71.3       | 68.4              | 81.4               | 70.0       | 71.2       | 68.8       | 64.0              | 76.3               | 68.6       | 74.8       |
| Overweight                           | 15.7       | 17.9              | 10.8               | 15.5       | 17.5       | 6.9        | 7.4               | 3.2                | 7.7        | 6.2        |
| Obese                                | 1.9        | 2.0               | 1.1                | 2.1        | 2.0        | 2.1        | 2.3               | 0.6                | 2.3        | 2.1        |
| Smoking status, pack years           |            |                   |                    |            |            |            |                   |                    |            |            |
| Never smoker                         | 28.7       | 23.6              | 27.6               | 31.0       | 31.8       | 54.2       | 44.6              | 66.6               | 62.6       | 45.8       |
| Former smoker, <20                   | 35.2       | 32.7              | 37.3               | 37.4       | 29.1       | 22.6       | 26.6              | 19.4               | 19.2       | 24.7       |
| Former smoker, ≥20                   | 11.9       | 11.9              | 18.6               | 8.1        | 19.6       | 4.2        | 4.9               | 3.3                | 1.6        | 10.0       |
| Former smoker, unknown               | 3.2        | 3.7               | 1.5                | 3.8        | 2.0        | 2.1        | 2.5               | 1.0                | 2.5        | 1.3        |
| Current smoker, <20                  | 10.7       | 14.8              | 5.9                | 11.2       | 5.1        | 9.6        | 14.1              | 5.7                | 7.6        | 7.1        |
| Current smoker, ≥20                  | 8.2        | 11.3              | 7.9                | 5.9        | 11.0       | 4.4        | 5.4               | 3.0                | 1.7        | 9.6        |
| Current smoker, unknown              | 0.5        | 0.9               | 0.2                | 0.5        | 0.3        | 0.3        | 0.6               | 0.0                | 0.2        | 0.2        |
| Alcohol intake                       |            |                   |                    |            |            |            |                   |                    |            |            |
| Non-drinker                          | 37.9       | 42.8              | 46.0               | 34.8       | 30.4       | 59.6       | 59.9              | 70.4               | 62.5       | 44.5       |
| Drinker                              | 57.9       | 52.9              | 49.9               | 61.5       | 63.6       | 36.0       | 35.7              | 25.8               | 33.3       | 50.6       |
| Education                            |            |                   |                    |            |            |            |                   |                    |            |            |
| ≤ High school graduate               | 49.2       | 42.2              | 25.4               | 64.1       | 30.3       | 52.3       | 40.6              | 35.5               | 72.0       | 40.3       |
| Some college/technical               | 28.4       | 35.3              | 34.8               | 22.6       | 29.7       | 28.6       | 36.4              | 36.0               | 18.2       | 32.2       |
| College graduate                     | 11.3       | 11.5              | 24.6               | 5.9        | 18.3       | 9.1        | 11.3              | 17.1               | 3.7        | 12.6       |
| Graduated and professional school    | 9.7        | 9.9               | 14.3               | 5.7        | 20.7       | 8.5        | 10.5              | 10.5               | 4.2        | 13.8       |
| Marital status                       |            |                   |                    |            |            |            |                   |                    |            |            |
| Married                              | 74.5       | 62.4              | 79.7               | 80.1       | 72.0       | 50.6       | 35.9              | 69.4               | 54.9       | 59.4       |
| Single                               | 6.3        | 7.1               | 9.4                | 4.1        | 10.3       | 7.1        | 6.5               | 7.8                | 8.0        | 5.6        |
| Separated/divorced/<br>widowed       | 18.2       | 29.0              | 10.4               | 14.9       | 17.0       | 41.1       | 55.9              | 22.3               | 35.8       | 34.3       |

|                                                |      |      |      |      |      |      |      |      |      |      |
|------------------------------------------------|------|------|------|------|------|------|------|------|------|------|
| Moderate/vigorous physical activity, hours/day |      |      |      |      |      |      |      |      |      |      |
| 0                                              | 8.0  | 8.9  | 3.1  | 9.2  | 6.3  | 8.0  | 5.7  | 2.4  | 13.2 | 4.0  |
| Quartile 1                                     | 18.5 | 20.3 | 15.5 | 19.1 | 15.2 | 16.8 | 17.6 | 14.4 | 19.0 | 11.2 |
| Quartile 2                                     | 19.1 | 20.6 | 18.4 | 18.1 | 20.9 | 24.4 | 28.7 | 26.0 | 21.2 | 21.6 |
| Quartile 3                                     | 26.6 | 25.7 | 31.1 | 25.3 | 28.8 | 28.4 | 28.6 | 32.9 | 24.9 | 34.0 |
| Quartile 4                                     | 25.5 | 21.4 | 31.0 | 25.6 | 27.4 | 18.6 | 15.3 | 22.7 | 16.9 | 27.5 |
| Red meat excluding processed meat, g/kcal/day  |      |      |      |      |      |      |      |      |      |      |
| Quintile 1                                     | 14.4 | 16.6 | 15.2 | 11.6 | 20.4 | 22.4 | 24.5 | 20.6 | 19.2 | 27.2 |
| Quintile 2                                     | 16.8 | 17.9 | 18.7 | 15.0 | 19.8 | 20.6 | 21.0 | 23.5 | 18.9 | 22.5 |
| Quintile 3                                     | 19.1 | 19.3 | 21.9 | 18.4 | 18.7 | 19.1 | 19.0 | 21.3 | 18.6 | 18.9 |
| Quintile 4                                     | 21.4 | 21.4 | 22.2 | 21.8 | 18.9 | 17.6 | 17.4 | 19.4 | 18.5 | 14.9 |
| Quintile 5                                     | 24.0 | 20.4 | 17.9 | 29.5 | 16.4 | 15.8 | 13.6 | 11.3 | 20.7 | 11.5 |
| Processed red meat, g/kcal/day                 |      |      |      |      |      |      |      |      |      |      |
| Quintile 1                                     | 13.9 | 10.8 | 15.0 | 14.6 | 17.2 | 22.9 | 19.4 | 25.2 | 23.3 | 28.4 |
| Quintile 2                                     | 16.7 | 12.4 | 17.0 | 18.7 | 17.8 | 21.0 | 17.5 | 23.3 | 22.9 | 22.3 |
| Quintile 3                                     | 19.1 | 15.0 | 20.9 | 20.7 | 19.3 | 19.1 | 17.6 | 21.5 | 20.2 | 18.1 |
| Quintile 4                                     | 21.6 | 21.0 | 22.7 | 22.1 | 19.0 | 17.4 | 18.9 | 16.7 | 17.1 | 15.5 |
| Quintile 5                                     | 24.5 | 36.4 | 20.1 | 20.3 | 20.9 | 15.1 | 22.2 | 9.6  | 12.2 | 10.8 |
| Total vegetables, g/kcal/day                   |      |      |      |      |      |      |      |      |      |      |
| Quintile 1                                     | 22.7 | 31.4 | 19.5 | 18.6 | 24.7 | 15.7 | 20.9 | 9.5  | 12.5 | 16.7 |
| Quintile 2                                     | 21.5 | 23.6 | 22.8 | 19.9 | 21.7 | 17.4 | 19.7 | 16.8 | 15.5 | 17.8 |
| Quintile 3                                     | 20.1 | 18.6 | 22.2 | 20.4 | 19.8 | 18.7 | 18.4 | 20.1 | 18.5 | 18.9 |
| Quintile 4                                     | 17.5 | 12.8 | 18.1 | 20.3 | 15.7 | 20.7 | 18.2 | 24.0 | 22.3 | 19.8 |
| Quintile 5                                     | 14.0 | 9.3  | 13.3 | 17.1 | 12.2 | 23.1 | 18.4 | 25.8 | 27.1 | 21.9 |
| Fruits plus juice, g/kcal/day                  |      |      |      |      |      |      |      |      |      |      |
| Quintile 1                                     | 24.3 | 25.3 | 26.1 | 24.0 | 21.4 | 15.5 | 15.6 | 15.3 | 15.1 | 16.5 |
| Quintile 2                                     | 22.3 | 21.9 | 22.6 | 22.9 | 20.3 | 16.9 | 16.7 | 17.0 | 17.4 | 15.9 |
| Quintile 3                                     | 19.3 | 18.1 | 20.7 | 19.6 | 19.3 | 19.2 | 18.4 | 20.0 | 19.1 | 20.5 |
| Quintile 4                                     | 16.9 | 16.2 | 17.2 | 16.7 | 18.5 | 20.8 | 20.6 | 22.0 | 20.3 | 21.3 |
| Quintile 5                                     | 13.0 | 14.2 | 9.3  | 13.1 | 14.5 | 23.3 | 24.3 | 21.8 | 23.9 | 20.8 |
| Dairy products, g/kcal/day                     |      |      |      |      |      |      |      |      |      |      |
| Quintile 1                                     | 20.5 | 24.3 | 36.2 | 16.0 | 12.7 | 17.2 | 21.5 | 31.4 | 12.1 | 10.3 |
| Quintile 2                                     | 20.5 | 22.7 | 22.1 | 19.8 | 16.3 | 18.0 | 21.5 | 20.2 | 15.8 | 14.2 |
| Quintile 3                                     | 19.8 | 19.4 | 17.6 | 20.9 | 18.6 | 18.8 | 19.1 | 18.0 | 19.6 | 16.8 |
| Quintile 4                                     | 19.0 | 16.8 | 13.0 | 21.2 | 21.9 | 19.6 | 17.5 | 15.0 | 22.2 | 21.0 |
| Quintile 5                                     | 16.1 | 12.5 | 7.0  | 18.5 | 24.6 | 22.0 | 15.9 | 11.6 | 26.0 | 32.7 |

|                                   |      |      |      |      |      |      |      |      |      |      |
|-----------------------------------|------|------|------|------|------|------|------|------|------|------|
| Calories, kcal/day                |      |      |      |      |      |      |      |      |      |      |
| Quintile 1                        | 13.3 | 19.4 | 9.9  | 11.6 | 11.2 | 23.6 | 27.7 | 23.7 | 19.9 | 23.9 |
| Quintile 2                        | 16.6 | 17.8 | 20.2 | 14.2 | 20.0 | 21.3 | 21.1 | 27.1 | 18.5 | 24.9 |
| Quintile 3                        | 19.3 | 18.6 | 24.7 | 17.6 | 22.3 | 19.2 | 17.9 | 22.8 | 18.2 | 22.2 |
| Quintile 4                        | 21.8 | 19.4 | 24.9 | 22.1 | 22.4 | 17.1 | 15.6 | 16.4 | 18.9 | 16.3 |
| Quintile 5                        | 24.7 | 20.5 | 16.2 | 30.8 | 18.2 | 14.4 | 13.2 | 6.2  | 20.3 | 7.7  |
| Age at first birth, years         |      |      |      |      |      |      |      |      |      |      |
| No children                       |      |      |      |      |      | 12.1 | 13.4 | 17.4 | 8.3  | 15.1 |
| < 20                              |      |      |      |      |      | 35.5 | 44.5 | 6.8  | 38.6 | 27.7 |
| 21-30                             |      |      |      |      |      | 43.5 | 34.1 | 62.9 | 44.7 | 48.1 |
| >30                               |      |      |      |      |      | 5.8  | 4.2  | 10.8 | 5.4  | 7.1  |
| Parity                            |      |      |      |      |      |      |      |      |      |      |
| Nulliparous                       |      |      |      |      |      | 12.1 | 13.4 | 17.4 | 8.3  | 15.1 |
| 1                                 |      |      |      |      |      | 11.5 | 15.8 | 11.9 | 7.3  | 12.5 |
| 2-3                               |      |      |      |      |      | 38.7 | 36.0 | 55.1 | 33.1 | 47.6 |
| >4                                |      |      |      |      |      | 36.3 | 33.4 | 15.0 | 49.7 | 23.9 |
| Age at menarche, years            |      |      |      |      |      |      |      |      |      |      |
| <12                               |      |      |      |      |      | 47.5 | 48.4 | 45.8 | 46.4 | 49.7 |
| 13-14                             |      |      |      |      |      | 37.7 | 36.6 | 39.4 | 37.8 | 38.5 |
| >14                               |      |      |      |      |      | 12.8 | 12.6 | 13.4 | 13.8 | 10.6 |
| Menopausal status                 |      |      |      |      |      |      |      |      |      |      |
| Pre-menopausal                    |      |      |      |      |      | 10.4 | 11.0 | 13.1 | 9.7  | 8.7  |
| Natural menopause                 |      |      |      |      |      | 48.2 | 39.5 | 56.3 | 52.1 | 52.2 |
| Oophorectomy                      |      |      |      |      |      | 13.9 | 16.5 | 11.9 | 11.4 | 16.0 |
| Hysterectomy                      |      |      |      |      |      | 17.2 | 21.5 | 9.7  | 15.9 | 15.6 |
| Hormone replacement therapy       |      |      |      |      |      |      |      |      |      |      |
| Never estrogen use                |      |      |      |      |      | 53.9 | 57.7 | 54.8 | 54.3 | 43.7 |
| Past estrogen use                 |      |      |      |      |      | 17.9 | 19.6 | 13.2 | 17.2 | 19.0 |
| Current unopposed                 |      |      |      |      |      | 11.2 | 10.4 | 12.5 | 10.1 | 15.0 |
| Current estrogen-progesterone use |      |      |      |      |      | 10.8 | 6.3  | 16.4 | 10.2 | 18.7 |

Values are percentages or mean  $\pm$  SD. Percentages may not add to 100 due to missing.

<sup>a</sup>Body mass index (BMI; kg/m<sup>2</sup>) categories include underweight (<18.5), normal weight (18.5-24.9), overweight (25.0-29.9), and obese ( $\geq$ 30.0).

**Supplemental Table 2.** Association between the neighborhood environment and body mass index (natural logarithmic scale) among men and women residing in California by race/ethnicity, Multiethnic Cohort, 1993-1996.

| Neighborhood attributes                                           | Men                             |                                 |                       |                     | Women                           |                                 |                       |                     |
|-------------------------------------------------------------------|---------------------------------|---------------------------------|-----------------------|---------------------|---------------------------------|---------------------------------|-----------------------|---------------------|
|                                                                   | African Americans<br>(n=11,466) | Japanese Americans<br>(n=6,042) | Latinos<br>(n=21,625) | Whites<br>(n=5,090) | African Americans<br>(n=20,266) | Japanese Americans<br>(n=6,296) | Latinos<br>(n=23,006) | Whites<br>(n=9,115) |
|                                                                   | GM (95% CI)                     | GM (95% CI)                     | GM (95% CI)           | GM (95% CI)         | GM (95% CI)                     | GM (95% CI)                     | GM (95% CI)           | GM (95% CI)         |
| Neighborhood SES <sup>a,b</sup>                                   |                                 |                                 |                       |                     |                                 |                                 |                       |                     |
| Quintile 5: high                                                  | 26.2 (25.8-26.7)                | 25.5 (25.0-26.0)                | 27.0 (26.7-27.3)      | 26.9 (26.4-27.5)    | 28.4 (27.9-28.9)                | 24.4 (23.8-25.0)                | 27.3 (26.9-27.8)      | 26.9 (26.2-27.6)    |
| Quintile 4                                                        | 26.3 (26.0-26.7)                | 25.6 (25.2-26.2)                | 27.2 (26.9-27.5)      | 27.2 (26.6-27.7)    | 29.0 (28.5-29.4)                | 24.7 (24.0-25.3)                | 27.5 (27.1-27.9)      | 27.7 (26.9-28.4)    |
| Quintile 3                                                        | 26.7 (26.3-27.1)                | 25.5 (25.0-26.0)                | 27.3 (27.1-27.6)      | 27.2 (26.6-27.8)    | 29.4 (28.9-29.9)                | 24.7 (24.1-25.4)                | 27.8 (27.4-28.2)      | 27.7 (26.9-28.5)    |
| Quintile 2                                                        | 26.6 (26.2-27.0)                | 25.3 (24.8-25.8)                | 27.4 (27.2-27.7)      | 27.1 (26.5-27.7)    | 29.6 (29.1-30.1)                | 24.8 (24.1-25.4)                | 27.9 (27.6-28.3)      | 28.0 (27.3-28.8)    |
| Quintile 1: low                                                   | 26.7 (26.3-27.1)                | 25.5 (24.9-26.1)                | 27.6 (27.3-27.8)      | 27.3 (26.6-28.0)    | 29.7 (29.3-30.2)                | 24.5 (23.8-25.3)                | 28.1 (27.7-28.5)      | 28.2 (27.3-29.1)    |
| <i>P</i> <sub>trend</sub>                                         | <b>&lt;0.01</b>                 | 0.54                            | <b>&lt;0.01</b>       | <b>0.05</b>         | <b>&lt;0.01</b>                 | <b>0.04</b>                     | <b>&lt;0.01</b>       | <b>&lt;0.01</b>     |
| Population density<br>(persons per km <sup>2</sup> ) <sup>b</sup> |                                 |                                 |                       |                     |                                 |                                 |                       |                     |
| Quintile 5: high                                                  | 25.9 (25.5-26.3)                | 25.5 (24.9-26.0)                | 27.2 (27.0-27.5)      | 27.1 (26.5-27.7)    | 29.3 (28.8-29.8)                | 24.9 (24.2-25.6)                | 27.7 (27.3-28.0)      | 27.9 (27.1-28.7)    |
| Quintile 4                                                        | 26.0 (25.6-26.3)                | 25.4 (24.9-25.9)                | 27.3 (27.1-27.6)      | 26.7 (26.1-27.3)    | 29.2 (28.7-29.6)                | 24.6 (24.0-25.2)                | 27.7 (27.3-28.1)      | 27.8 (27.1-28.6)    |
| Quintile 3                                                        | 25.9 (25.5-26.3)                | 25.6 (25.1-26.1)                | 27.4 (27.1-27.7)      | 26.8 (26.2-27.4)    | 29.2 (28.7-29.7)                | 24.5 (23.9-25.1)                | 27.7 (27.3-28.1)      | 27.6 (26.9-28.4)    |
| Quintile 2                                                        | 25.9 (25.5-26.3)                | 25.4 (24.9-25.9)                | 27.3 (27.1-27.6)      | 26.6 (26.0-27.3)    | 29.3 (28.8-29.8)                | 24.5 (23.9-25.1)                | 27.8 (27.4-28.2)      | 27.7 (26.9-28.4)    |
| Quintile 1: low                                                   | 26.0 (25.6-26.4)                | 25.6 (25.1-26.1)                | 27.2 (27.0-27.5)      | 26.6 (26.1-27.2)    | 29.1 (28.6-29.6)                | 24.5 (23.9-25.2)                | 27.8 (27.5-28.2)      | 27.4 (26.7-28.2)    |
| <i>P</i> <sub>trend</sub>                                         | 0.55                            | 0.75                            | 0.94                  | 0.12                | 0.67                            | 0.20                            | 0.13                  | 0.07                |
| % commute by<br>car/motorcycle <sup>b</sup>                       |                                 |                                 |                       |                     |                                 |                                 |                       |                     |
| Quintile 1: low                                                   | 26.8 (26.4-27.1)                | 25.4 (24.9-25.9)                | 27.3 (27.0-27.6)      | 26.6 (26.0-27.2)    | 29.5 (29.0-29.9)                | 24.5 (23.8-25.2)                | 27.8 (27.4-28.2)      | 27.4 (26.7-28.2)    |
| Quintile 2                                                        | 26.8 (26.5-27.2)                | 25.4 (24.9-26.0)                | 27.3 (27.0-27.5)      | 26.7 (26.1-27.3)    | 29.3 (28.9-29.7)                | 24.5 (23.9-25.1)                | 27.8 (27.5-28.2)      | 27.4 (26.7-28.1)    |
| Quintile 3                                                        | 26.8 (26.4-27.2)                | 25.6 (25.1-26.1)                | 27.3 (27.0-27.5)      | 26.8 (26.2-27.4)    | 29.3 (28.9-29.7)                | 24.5 (23.9-25.2)                | 27.7 (27.3-28.0)      | 27.5 (26.8-28.2)    |
| Quintile 4                                                        | 27.0 (26.6-27.4)                | 25.5 (25.0-26.0)                | 27.3 (27.1-27.6)      | 26.9 (26.3-27.5)    | 29.3 (28.8-29.7)                | 24.6 (24.0-25.2)                | 27.6 (27.2-27.9)      | 27.6 (26.9-28.3)    |
| Quintile 5: high                                                  | 26.8 (26.4-27.1)                | 25.5 (25.0-26.0)                | 27.4 (27.1-27.6)      | 26.9 (26.3-27.5)    | 29.3 (28.9-29.7)                | 24.8 (24.2-25.4)                | 27.6 (27.2-27.9)      | 27.8 (27.1-28.6)    |
| <i>P</i> <sub>trend</sub>                                         | 0.45                            | 0.88                            | 0.30                  | <b>0.02</b>         | 0.39                            | <b>0.03</b>                     | <b>0.03</b>           | <b>0.03</b>         |
| REI <sup>c,d</sup>                                                |                                 |                                 |                       |                     |                                 |                                 |                       |                     |
| 0                                                                 | 26.0 (25.6-26.5)                | 25.6 (25.1-26.1)                | 27.4 (27.2-27.7)      | 26.8 (26.2-27.4)    | 29.1 (28.5-29.6)                | 24.4 (23.8-25.0)                | 27.8 (27.4-28.2)      | 27.5 (26.8-28.3)    |
| Quartile 1: low                                                   | 25.8 (25.4-26.2)                | 25.6 (25.1-26.0)                | 27.3 (27.0-27.6)      | 26.8 (26.2-27.4)    | 29.3 (28.7-29.8)                | 24.5 (23.9-25.2)                | 27.7 (27.3-28.1)      | 27.6 (26.9-28.4)    |
| Quartile 2                                                        | 25.9 (25.5-26.3)                | 25.5 (25.0-26.0)                | 27.4 (27.2-27.7)      | 26.8 (26.2-27.4)    | 29.2 (28.7-29.7)                | 24.6 (24.0-25.2)                | 27.7 (27.3-28.1)      | 27.8 (27.1-28.6)    |
| Quartile 3                                                        | 25.9 (25.5-26.3)                | 25.5 (25.0-26.0)                | 27.4 (27.1-27.6)      | 26.6 (26.0-27.2)    | 29.1 (28.6-29.6)                | 24.7 (24.1-25.3)                | 27.8 (27.4-28.1)      | 27.8 (27.1-28.6)    |
| Quartile 4: high, <1                                              | 25.8 (25.4-26.2)                | 25.4 (24.9-26.0)                | 27.3 (27.0-27.6)      | 26.8 (26.2-27.4)    | 29.1 (28.7-29.6)                | 24.6 (23.9-25.3)                | 27.9 (27.5-28.3)      | 27.6 (26.9-28.4)    |
| Quartile 4: high, ≥1                                              | 26.2 (25.6-26.9)                | 25.6 (24.8-26.4)                | 27.3 (26.9-27.7)      | 27.2 (26.3-28.1)    | 29.4 (28.7-30.1)                | 24.6 (23.8-25.5)                | 27.7 (27.1-28.3)      | 27.7 (26.8-28.7)    |
| No restaurant                                                     | 25.8 (25.1-26.6)                | 25.2 (24.6-25.8)                | 27.0 (26.6-27.4)      | 26.5 (25.8-27.3)    | 29.3 (28.7-30.0)                | 24.7 (24.0-25.5)                | 27.5 (27.0-28.0)      | 27.6 (26.8-28.5)    |
| <i>P</i> <sub>trend</sub> <sup>f</sup>                            | 0.52                            | 0.52                            | 0.30                  | 0.50                | 0.92                            | 0.17                            | 0.33                  | 0.61                |

|                                                                   |                  |                  |                  |                   |                  |                  |                  |                   |  |
|-------------------------------------------------------------------|------------------|------------------|------------------|-------------------|------------------|------------------|------------------|-------------------|--|
| RFEI <sup>d,e</sup>                                               |                  |                  |                  |                   |                  |                  |                  |                   |  |
| 0                                                                 | 25.9 (25.2-26.5) | 25.4 (24.9-25.9) | 27.1 (26.7-27.4) | 26.8 (26.1-27.5)  | 28.5 (27.7-29.3) | 24.3 (23.7-25.0) | 27.8 (27.3-28.3) | 27.5 (26.6-28.3)  |  |
| Quartile 1: low                                                   | 26.1 (25.7-26.5) | 25.3 (24.9-25.8) | 27.2 (27.0-27.4) | 26.7 (26.1-27.3)  | 29.2 (28.8-29.6) | 24.8 (24.2-25.4) | 27.7 (27.3-28.0) | 27.8 (27.1-28.5)  |  |
| Quartile 2                                                        | 25.8 (25.4-26.1) | 25.4 (24.9-25.9) | 27.3 (27.1-27.6) | 26.8 (26.3-27.5)  | 29.3 (28.9-29.6) | 24.7 (24.0-25.3) | 27.6 (27.3-28.0) | 27.8 (27.1-28.6)  |  |
| Quartile 3                                                        | 25.9 (25.6-26.3) | 25.5 (25.0-25.9) | 27.3 (27.1-27.6) | 26.8 (26.2-27.4)  | 29.2 (28.8-29.6) | 24.7 (24.1-25.3) | 27.8 (27.4-28.2) | 28.0 (27.3-28.7)  |  |
| Quartile 4: high                                                  | 26.0 (25.7-26.4) | 25.4 (25.0-25.9) | 27.3 (27.1-27.6) | 26.7 (26.1-27.3)  | 29.3 (29.0-29.7) | 24.6 (24.1-25.3) | 27.8 (27.4-28.1) | 27.4 (26.7-28.1)  |  |
| No retail food                                                    | 26.0 (25.2-26.9) | 25.5 (24.6-26.4) | 27.2 (26.6-27.9) | 26.5 (25.7-27.3)  | 29.6 (28.6-30.7) | 24.9 (24.1-25.8) | 27.6 (26.9-28.5) | 27.7 (26.7-28.6)  |  |
| $P_{\text{trend}}^f$                                              | 0.81             | 0.37             | <b>0.05</b>      | 0.84              | 0.24             | 0.99             | 0.24             | 0.06              |  |
| Number of businesses <sup>d</sup>                                 |                  |                  |                  |                   |                  |                  |                  |                   |  |
| Quintile 5: high                                                  | 25.8 (25.4-26.3) | 25.4 (24.9-25.9) | 27.1 (26.9-27.4) | 26.8 (26.2-27.5)  | 28.8 (28.3-29.3) | 24.5 (23.9-25.1) | 27.5 (27.1-27.9) | 27.4 (26.6-28.1)  |  |
| Quintile 4                                                        | 25.9 (25.5-26.3) | 25.5 (25.0-26.0) | 27.3 (27.1-27.6) | 26.7 (26.1-27.3)  | 29.3 (28.8-29.7) | 24.6 (24.0-25.2) | 27.7 (27.4-28.1) | 27.5 (26.8-28.3)  |  |
| Quintile 3                                                        | 26.1 (25.7-26.4) | 25.6 (25.0-26.1) | 27.3 (27.1-27.6) | 26.8 (26.2-27.4)  | 29.2 (28.8-29.7) | 24.6 (24.0-25.2) | 27.7 (27.4-28.1) | 27.8 (27.1-28.6)  |  |
| Quintile 2                                                        | 25.9 (25.5-26.3) | 25.6 (25.1-26.1) | 27.3 (27.0-27.5) | 26.9 (26.3-27.5)  | 29.5 (29.0-29.9) | 24.8 (24.2-25.4) | 27.9 (27.5-28.3) | 27.8 (27.1-28.6)  |  |
| Quintile 1: low                                                   | 26.0 (25.7-26.4) | 25.4 (24.9-25.9) | 27.5 (27.2-27.7) | 26.6 (26.0-27.2)  | 29.3 (28.9-29.8) | 24.5 (23.9-25.1) | 27.8 (27.4-28.1) | 27.9 (27.2-28.7)  |  |
| $P_{\text{trend}}$                                                | 0.33             | 0.82             | <b>0.01</b>      | 0.62              | <b>&lt;0.01</b>  | 0.45             | <b>0.02</b>      | <b>&lt;0.01</b>   |  |
| Number of parks <sup>d</sup>                                      |                  |                  |                  |                   |                  |                  |                  |                   |  |
| ≥3                                                                | 26.1 (25.7-26.5) | 25.4 (24.9-25.9) | 27.4 (27.1-27.7) | 26.9 (26.2-27.5)  | 29.2 (28.8-29.7) | 24.7 (24.1-25.4) | 27.7 (27.3-28.1) | 27.8 (27.1-28.6)  |  |
| 2                                                                 | 25.9 (25.5-26.3) | 25.5 (25.0-26.0) | 27.3 (27.0-27.5) | 26.7 (26.1-27.3)  | 29.3 (28.8-29.7) | 24.5 (23.9-25.1) | 27.8 (27.4-28.1) | 27.8 (27.0-28.5)  |  |
| 1                                                                 | 25.9 (25.5-26.2) | 25.6 (25.1-26.1) | 27.3 (27.1-27.6) | 26.7 (26.1-27.3)  | 29.2 (28.7-29.6) | 24.6 (24.0-25.2) | 27.7 (27.4-28.1) | 27.6 (26.9-28.3)  |  |
| 0                                                                 | 25.9 (25.5-26.2) | 25.5 (25.0-26.0) | 27.2 (27.0-27.5) | 26.8 (26.3-27.4)  | 29.2 (28.8-29.7) | 24.6 (24.0-25.3) | 27.7 (27.3-28.1) | 27.6 (26.8-28.3)  |  |
| $P_{\text{trend}}$                                                | 0.10             | 0.37             | 0.09             | 0.95              | 0.48             | 0.56             | 0.36             | <b>0.03</b>       |  |
| Traffic density (miles traveled/ mile <sup>2</sup> ) <sup>d</sup> |                  |                  |                  |                   |                  |                  |                  |                   |  |
| Quintile 1: low                                                   | 25.9 (25.5-26.3) | 25.4 (24.9-25.9) | 27.4 (27.1-27.6) | 27.1 (26.5-27.7)  | 29.2 (28.8-29.7) | 24.6 (24.0-25.2) | 27.7 (27.3-28.1) | 27.8 (27.0- 28.5) |  |
| Quintile 2                                                        | 26.0 (25.6-26.4) | 25.6 (25.1-26.1) | 27.3 (27.0-27.6) | 26.8 (26.2- 27.4) | 29.1 (28.7-29.6) | 24.5 (23.9-25.1) | 27.8 (27.4-28.1) | 27.6 (26.8- 28.3) |  |
| Quintile 3                                                        | 26.0 (25.6-26.3) | 25.6 (25.1-26.1) | 27.3 (27.1-27.6) | 26.8 (26.2-27.4)  | 29.2 (28.8-29.7) | 24.8 (24.1-25.4) | 27.7 (27.3-28.1) | 27.6 (26.9- 28.4) |  |
| Quintile 4                                                        | 25.9 (25.5-26.3) | 25.4 (24.9-25.9) | 27.3 (27.0-27.5) | 26.7 (26.1-27.3)  | 29.2 (28.8-29.7) | 24.6 (24.0-25.2) | 27.7 (27.3-28.1) | 27.7 (27.0- 28.5) |  |
| Quintile 5: high                                                  | 25.9 (25.5-26.3) | 25.5 (25.0-26.0) | 27.3 (27.0-27.6) | 26.5 (25.9- 27.1) | 29.3 (28.8-29.8) | 24.6 (24.0-25.2) | 27.8 (27.4-28.1) | 27.7 (27.0- 28.5) |  |
| $P_{\text{trend}}$                                                | 0.49             | 0.68             | 0.48             | <b>&lt;0.01</b>   | 0.50             | 0.84             | 0.83             | 0.54              |  |

Values in bold represent  $P < 0.05$ .

Geometric mean (GM) for body mass index (BMI) level estimated using multivariable linear regression models adjusted for age, marital status, BMI at age 21, smoking and cigarette pack years, alcohol intake, education, hours of moderate and vigorous activity per day, density of red meat, density of processed red meat, density of total vegetables, density of all fruits plus juice, density of all dairy products, total calories, all variables listed in the table, and clustering effect of block group. Model for women also adjusted for age at menarche, age at first live birth, number of children, menopausal status, and hormone replacement therapy.

<sup>a</sup>Based on SES composite index of seven indicator variables for Census block groups (Liu education index, proportion with a blue collar job, proportion older than age 16 in the workforce without a job, median household income, percent below 200% of the poverty line, median rent, median house value).

<sup>b</sup>U.S. Census block group-level measure; categories based on distribution for block groups in Los Angeles County.

<sup>c</sup>Ratio of the number of fast-food restaurants to other restaurants.

<sup>d</sup>Businesses/parks within walking distance of residence (1.6 km pedestrian network) or traffic density within 0.5 km radius of residence; quintiles/quartiles based on study participant distribution.

<sup>e</sup>Ratio of the average number of convenience stores, liquor stores, and fast-food restaurants to supermarkets and farmers' markets.

<sup>f</sup>No business (restaurant or retail) was excluded in linear trend analysis.





Values in bold represent  $P < 0.05$ .

<sup>a</sup>Minimally adjusted Model 0 adjusted for age and study age, marital status, BMI at age 21, and education. Men and women modeled separately; women-specific models also adjusted for reproductive factors (age at menarche, age at first live birth, number of children, hormone replacement therapy).

<sup>b</sup>Models 1, 1a, 1b, and 1c adjusted for same covariates as Model 0 with additional adjustments for modifiable risk factors, including unhealthy behaviors (smoking and cigarette pack years and alcohol intake; Models 1 and 1a), physical activity (hours of moderate and vigorous activity per day; Models 1 and 1b) and dietary intake (density of red meat, density of processed red meat, density of total vegetables, density of all fruits plus juice, density of all dairy products, total calories; Models 1 and 1c).

<sup>c</sup>Models 2 adjusted for same covariates as Model 1 with additional adjustment for built environment attributes (population density, % commute by car/motorcycle, REI, RFEI, number of businesses, number of parks, traffic density).

<sup>d</sup>Neighborhood socioeconomic status (nSES) based on SES composite index of seven indicator variables for Census block groups (Liu education index, proportion with a blue collar job, proportion older than age 16 in the workforce without a job, median household income, percent below 200% of the poverty line, median rent, median house value).
